# Supplementary material for: Cinnamon (Cinnamomum cassia) water extract improves diarrhea symptoms by changing the gut environment: a randomized controlled trial
Source: Royal Society of Chemistry journal article supplement (doi:10.1039/d2fo01835g), 2023-01-01
Supplement: d2fo01835g1.pdf [file d2fo01835g1.pdf]

(A)

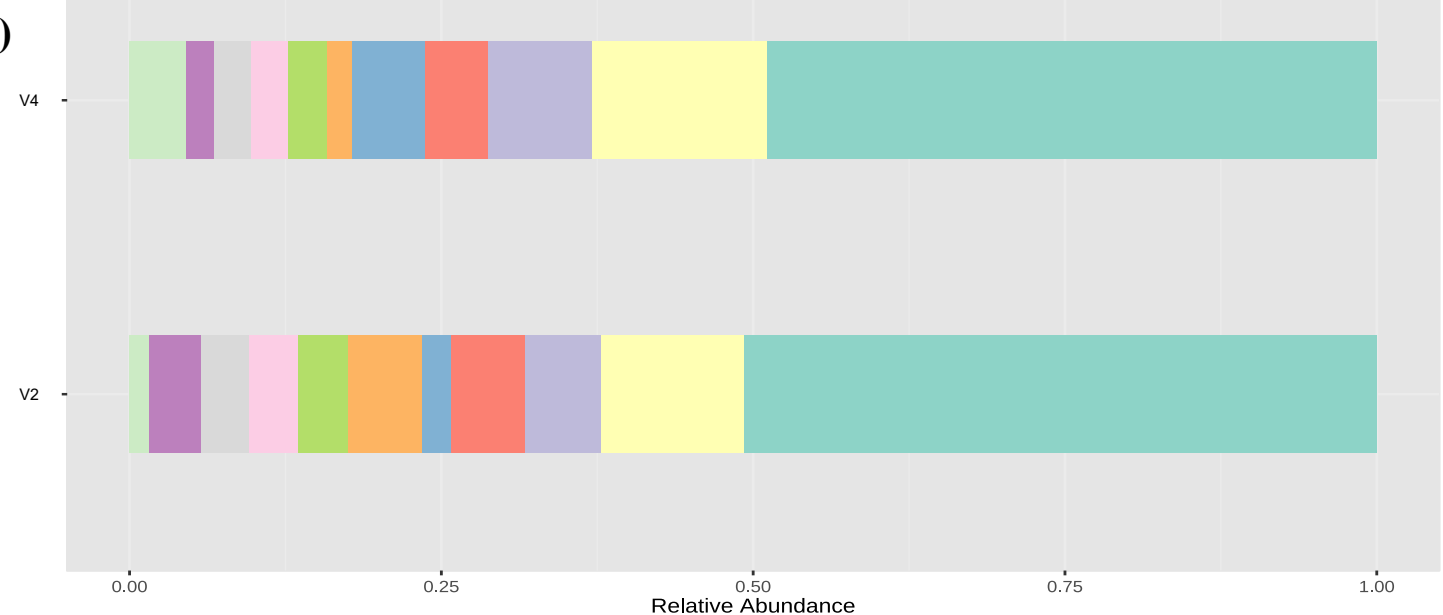

Family

- Others
- Bacteria|Firmicutes|Clostridia|Clostridiales|Ruminococcaceae
- Bacteria|Actinobacteria|Actinobacteria|Bifidobacteriales|Bifidobacteriaceae
- Bacteria|Firmicutes|Clostridia|Clostridiales|Lachnospiraceae
- Bacteria|Firmicutes|Bacilli|Lactobacillales|Streptococcaceae
- Bacteria|Bacteroidetes|Bacteroidia|Bacteroidales|Bacteroidaceae
- Bacteria|Firmicutes|Negativicutes|Selenomonadales|Veillonellaceae
- Bacteria|Verrucomicrobia|Verrucomicrobiae|Verrucomicrobiales|Verrucomicrobiaceae
- Bacteria|Firmicutes|Clostridia|Clostridiales|Peptostreptococcaceae
- Bacteria|Actinobacteria|Coriobacteriia|Coriobacteriales|Coriobacteriaceae
- Bacteria|Proteobacteria|Gammaproteobacteria|Enterobacteriales|Enterobacteriaceae

(B)

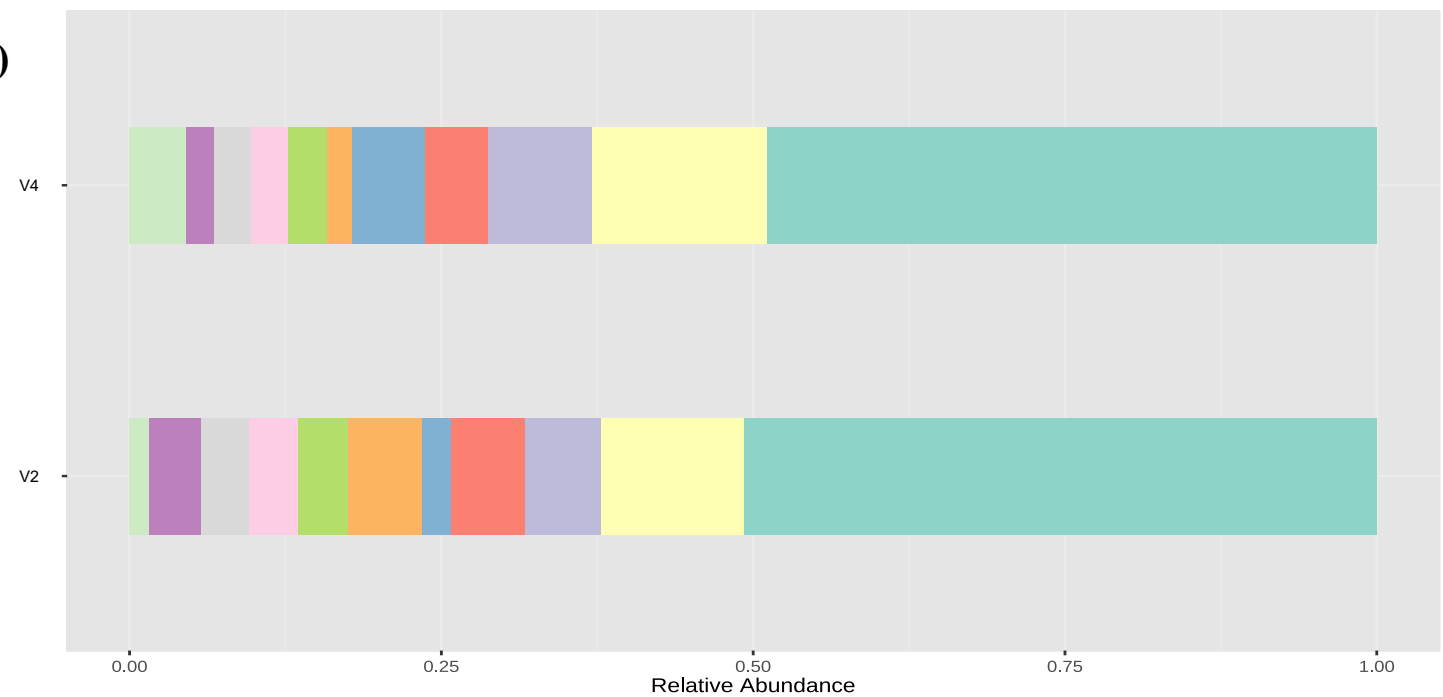

Genus

- Others
- Bacteria|Actinobacteria|Actinobacteria|Bifidobacteriales|Bifidobacteriaceae|Bifidobacterium
- Bacteria|Firmicutes|Bacilli|Lactobacillales|Streptococcaceae|Streptococcus
- Bacteria|Bacteroidetes|Bacteroidia|Bacteroidales|Bacteroidaceae|Bacteroides
- Bacteria|Verrucomicrobia|Verrucomicrobiae|Verrucomicrobiales|Verrucomicrobiaceae|Akkermansia
- Bacteria|Firmicutes|Clostridia|Clostridiales|Ruminococcaceae|Ruminococcaceae\_UCG\_014
- Bacteria|Firmicutes|Clostridia|Clostridiales|Ruminococcaceae|Subdoligranulum
- Bacteria|Firmicutes|Clostridia|Clostridiales|Peptostreptococcaceae|Intestinibacter
- Bacteria|Firmicutes|Clostridia|Clostridiales|Ruminococcaceae|Eubacterium\_coprostanoligenes\_group
- Bacteria|Firmicutes|Clostridia|Clostridiales|Clostridiaceae\_1|Clostridium\_sensu\_stricto\_1
- Bacteria|Firmicutes|Negativicutes|Selenomonadales|Veillonellaceae|Dialister
